# Supplementary material
Source: ML conference proceedings conference paper supplement (https://openreview.net/forum?id=3CbwwCpsSk)
Supplement: supplementary_material [file supp_experiments.pdf › Paper_Materials/supp_experiments.pdf]

---

# Supplementary Material

---

Anonymous Author(s)

Affiliation

Address

email

## 1 A. Additional Experimental Results

2 These experiments were done over four different random seeds. Note that we will update the main  
3 manuscript with the new numbers.

Table 1: Out-of-distribution Micro-F<sub>1</sub> under Length OOD test

| Algorithm   | Vanilla            | Adaptive           | Tropical           |
|-------------|--------------------|--------------------|--------------------|
| ConvexHull  | 42.75% $\pm$ 2.06% | 48.25% $\pm$ 0.96% | 97.00% $\pm$ 1.15% |
| Quickselect | 2.50% $\pm$ 0.58%  | 11.00% $\pm$ 4.29% | 68.50% $\pm$ 4.31% |
| SCC         | 46.50% $\pm$ 5.07% | 51% $\pm$ 0.82%    | 63.50% $\pm$ 6.61% |
| SubsetSum   | 21.13% $\pm$ 2.45% | 22.75% $\pm$ 5.25% | 87.50% $\pm$ 6.45% |
| 3SUM        | 80.00% $\pm$ 0.82% | 79.75% $\pm$ 0.50% | 82.75% $\pm$ 1.59% |

Table 2: Out-of-distribution Micro-F<sub>1</sub> under Value OOD test

| Algorithm   | Vanilla            | Adaptive            | Tropical           |
|-------------|--------------------|---------------------|--------------------|
| ConvexHull  | 22.75% $\pm$ 3.59% | 23.77% $\pm$ 3.10%  | 34.25% $\pm$ 1.71% |
| Quickselect | 0.25% $\pm$ 0.50%  | 3.25% $\pm$ 4.72%   | 50.25% $\pm$ 5.06% |
| SCC         | 68.75% $\pm$ 9.43% | 70.25% $\pm$ 4.11%  | 77.75% $\pm$ 4.41% |
| SubsetSum   | 34.75% $\pm$ 6.60% | 28.50% $\pm$ 10.12% | 79.25% $\pm$ 5.38% |
| 3SUM        | 26.00% $\pm$ 3.16% | 26.25% $\pm$ 3.50%  | 22.00% $\pm$ 2.16% |

Table 3: Out-of-distribution Micro-F<sub>1</sub> under Adversarial Attack test

| Algorithm   | Vanilla            | Adaptive           | Tropical            |
|-------------|--------------------|--------------------|---------------------|
| ConvexHull  | 90.75% $\pm$ 2.22% | 91.00% $\pm$ 2.16% | 96.00% $\pm$ 2.16%  |
| Quickselect | 7.00% $\pm$ 8.72%  | 21.75% $\pm$ 2.36% | 55.65% $\pm$ 8.33%  |
| SCC         | 21.50% $\pm$ 1.29% | 24.50% $\pm$ 4.80% | 29.25% $\pm$ 4.03%  |
| SubsetSum   | 3.75% $\pm$ 1.50%  | 3% $\pm$ 1.63%     | 72.75% $\pm$ 10.01% |
| 3SUM        | 47.50% $\pm$ 9.47% | 49.25% $\pm$ 9.22% | 65.25% $\pm$ 3.59%  |

Table 4: Out-of-distribution MSE under Length OOD test

| Dataset            | Vanilla            | Adaptive           | Tropical                            |
|--------------------|--------------------|--------------------|-------------------------------------|
| BalancedPartition  | 6.08 $\pm$ 4.96    | 2.74 $\pm$ 1.70    | <u>0.25 <math>\pm</math> 0.01</u>   |
| BinPacking         | 112.62 $\pm$ 23.18 | 101.12 $\pm$ 8.69  | <u>94.96 <math>\pm</math> 4.10</u>  |
| FloydWarshall      | 12.81 $\pm$ 4.03   | 1.31 $\pm$ 0.36    | <u>0.81 <math>\pm</math> 0.08</u>   |
| FractionalKnapsack | 103.75 $\pm$ 15.56 | 100.50 $\pm$ 12.26 | <u>96.25 <math>\pm</math> 14.93</u> |
| Knapsack           | 44.50 $\pm$ 3.11   | 41.75 $\pm$ 5.19   | <u>32.75 <math>\pm</math> 7.80</u>  |
| MinCoinChange      | 0.55 $\pm$ 0.28    | 0.29 $\pm$ 0.12    | <u>0.16 <math>\pm</math> 0.02</u>   |

Table 5: Out-of-distribution MSE under Value OOD test

| Dataset            | Vanilla            | Adaptive           | Tropical                             |
|--------------------|--------------------|--------------------|--------------------------------------|
| BalancedPartition  | 36.01 $\pm$ 9.04   | 5.85 $\pm$ 0.65    | 5.46 $\pm$ 0.97                      |
| BinPacking         | 0.63 $\pm$ 0.13    | 12.32 $\pm$ 9.59   | <u>0.39 <math>\pm</math> 0.17</u>    |
| FloydWarshall      | 87.68 $\pm$ 5.65   | 56.30 $\pm$ 3.04   | <u>55.30 <math>\pm</math> 4.36</u>   |
| FractionalKnapsack | 363.75 $\pm$ 45.29 | 267.50 $\pm$ 50.43 | <u>169.50 <math>\pm</math> 20.42</u> |
| Knapsack           | 44.25 $\pm$ 9.57   | 45.25 $\pm$ 2.22   | <u>36.25 <math>\pm</math> 10.87</u>  |
| MinCoinChange      | 1.10 $\pm$ 0.38    | 0.90 $\pm$ 0.37    | <u>0.32 <math>\pm</math> 0.12</u>    |

Table 6: Out-of-distribution MSE under Adversarial Attack test

| Dataset            | Vanilla           | Adaptive         | Tropical                           |
|--------------------|-------------------|------------------|------------------------------------|
| BalancedPartition  | 10.59 $\pm$ 2.01  | 1.33 $\pm$ 1.09  | <u>0.34 <math>\pm</math> 0.05</u>  |
| BinPacking         | 0.59 $\pm$ 0.24   | 1.20 $\pm$ 0.50  | <u>0.31 <math>\pm</math> 0.33</u>  |
| FloydWarshall      | 7.54 $\pm$ 3.63   | 5.29 $\pm$ 2.56  | <u>4.39 <math>\pm</math> 1.62</u>  |
| FractionalKnapsack | 7.83 $\pm$ 1.28   | 7.56 $\pm$ 1.30  | <u>6.75 <math>\pm</math> 1.25</u>  |
| Knapsack           | 68.50 $\pm$ 16.90 | 56.00 $\pm$ 4.83 | <u>34.00 <math>\pm</math> 7.16</u> |
| MinCoinChange      | 1.42 $\pm$ 0.33   | 1.07 $\pm$ 0.58  | <u>0.82 <math>\pm</math> 0.26</u>  |
